# Supplementary material
Source: MDPI journal article supplement (https://www.mdpi.com/2673-4931/25/1/29)
Supplement: s1 [file s1]

Supplementary Materials

# Estimating the Potential Evapotranspiration of Egypt Using a Regional Climate Model and a High-Resolution Reanalysis Dataset <sup>†</sup>

Samy Ashraf Anwar <sup>1,\*</sup> and Irida Lazić <sup>2</sup>

<sup>1</sup> Egyptian Meteorological Authority, Qobry EL-Kobba, Cairo P.O. Box 11784, Egypt

<sup>2</sup> Faculty of Physics, Institute for Meteorology, University of Belgrade, Dobračina 16, 11000 Belgrade, Serbia; irida.lazic@ff.bg.ac.rs

\* Correspondence: ratesamy@yahoo.com

<sup>†</sup> Presented at the 7th International Electronic Conference on Water Sciences, 15–30 March 2023; Available online: <https://ecws-7.sciforum.net>.

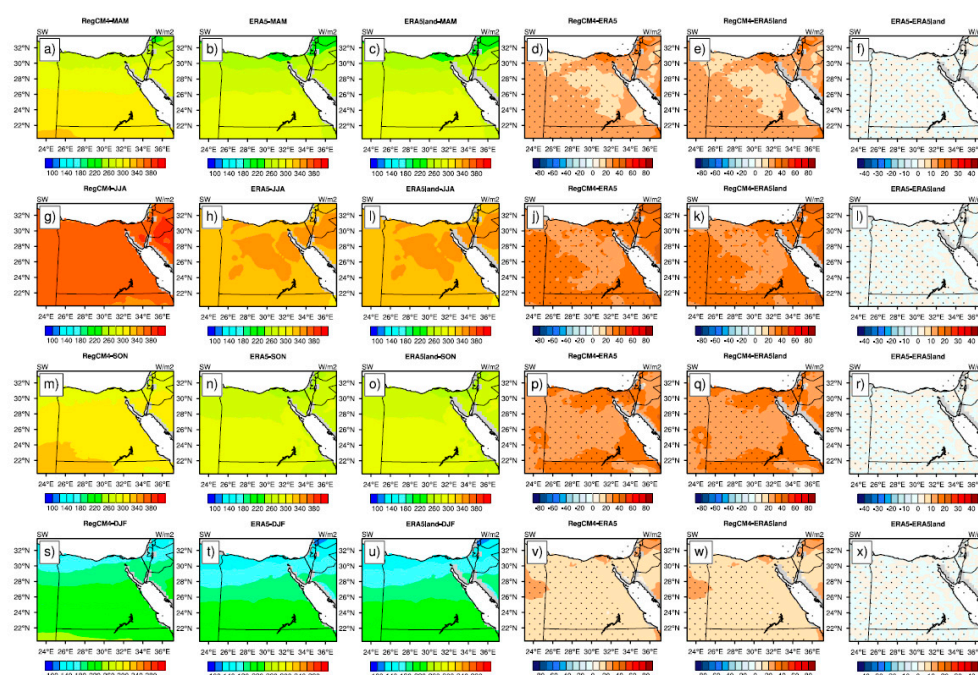

Citation: Anwar, S.A.; Lazić, I. Estimating the Potential Evapotranspiration of Egypt Using a Regional Climate Model and a High-Resolution Reanalysis Dataset. *Environ. Sci. Proc.* **2023**, *25*, x. <https://doi.org/10.3390/ECWS-7-14253>.

Academic Editor: Athanasios Loukas

Published: 16 March 2023

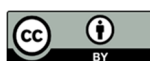

Copyright: © 2023 by the authors. Submitted for possible open access publication under the terms and conditions of the Creative Commons Attribution (CC BY) license (<https://creativecommons.org/licenses/by/4.0/>).

**Figure S1.** The figure shows the global incident solar radiation over the period 1981–2017 (SW; in  $W m^{-2}$ ; hereafter RegCM4) for: MAM season in the first row (a–f); JJA in the second (g–l); SON in the third (m–r); DJF in the fourth (s–x). For each row, RegCM4 is on the left, followed by ERA5. ERA5land is in the third from left, RegCM4 minus ERA5, RegCM4 minus ERA5land and the difference between ERA5 and ERA5land. Significant difference/bias is indicated in black dots using student t-test with alpha equals to 5%. Please note that RegCM4 model was driven by EIN15.

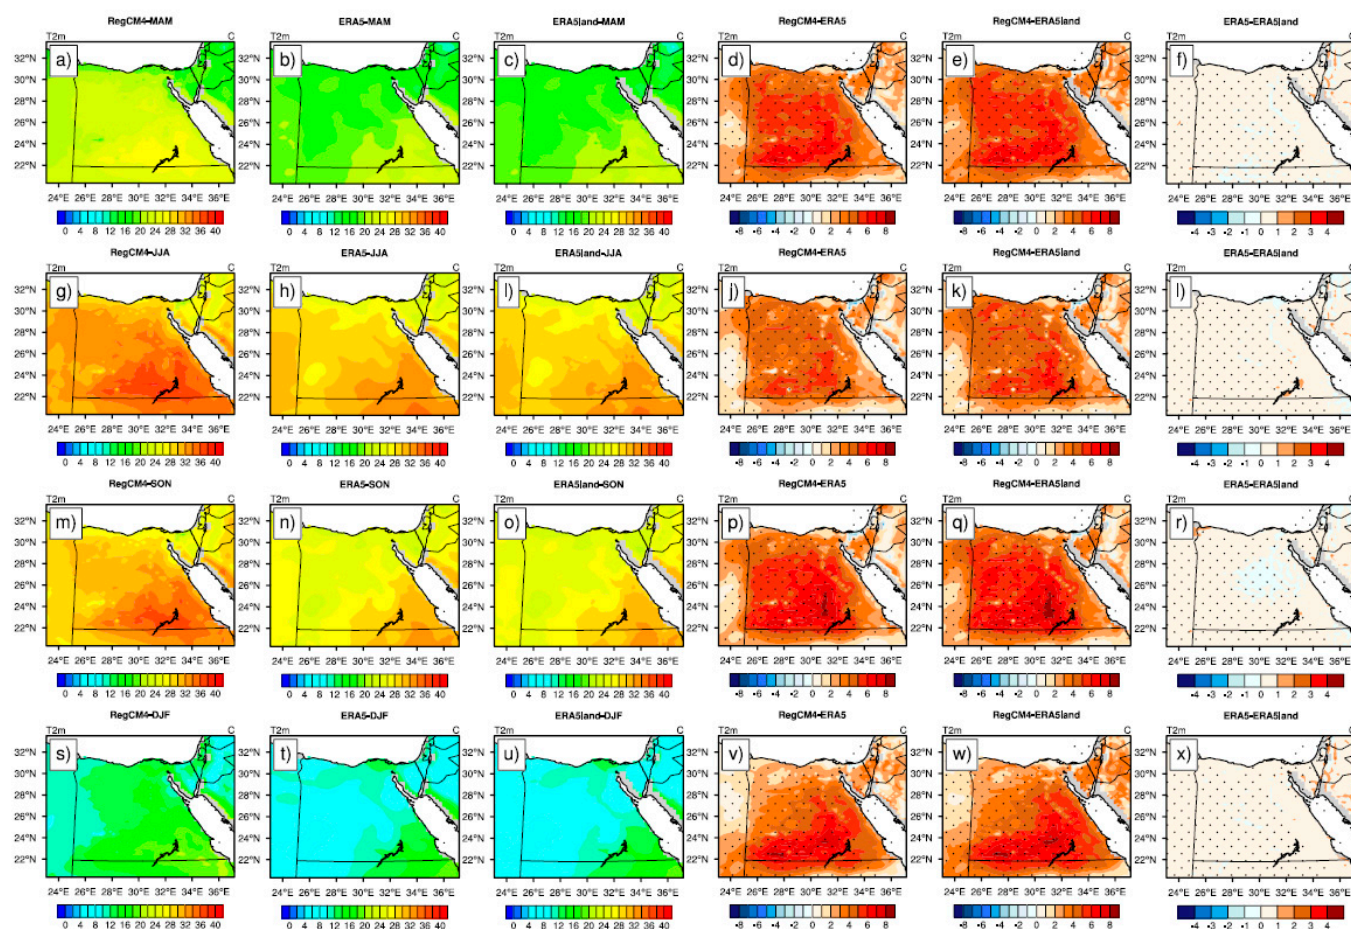

**Figure S2.** The figure shows the 2-m mean air temperature over the period 1981–2017 (T2m; in °C; hereafter RegCM4) for: MAM season in the first row (a–f); JJA in the second (g–l); SON in the third (m–r), DJF in the fourth (s–x). For each row, RegCM4 is on the left, followed by ERA5. ERA5land is in the third from left, RegCM4 minus ERA5, RegCM4 minus ERA5land and the difference between ERA5 and ERA5land. Significant difference/bias is indicated in black dots using student t-test with alpha equals to 5%. Please note that RegCM4 model was driven by EIN15.
