# Supplementary material
Source: MDPI journal article supplement (https://www.mdpi.com/2673-4931/25/1/29)
Supplement: s1 [file s1]

Archive with 1 entries (1 files):
- environsciproc-2339656-supplementary.pdf
